# Supplementary material for: Expression Profiling of Plasmodium berghei HSP70 Genes for Generation of Bright Red Fluorescent Parasites
Source: PubMed Central journal article supplement (PMC3754930; doi:10.1371/journal.pone.0072771), 2013-08-27
Supplement: pone.0072771.s002.pdf [file pone.0072771.s002.pdf]

**Supplemental Table S1. Overview of *Plasmodium berghei* Heat Shock Protein 70 (HSP70) members**

| <i>Pf</i> HSP70 <sup>a</sup>          | <i>Pb</i> HSP70 proteins             |                                      |                                            |                                      |                                  |
|---------------------------------------|--------------------------------------|--------------------------------------|--------------------------------------------|--------------------------------------|----------------------------------|
|                                       | <i>Pb</i> HSP70/1<br>(PBANKA_071190) | <i>Pb</i> HSP70/2<br>(PBANKA_081890) | <i>Pb</i> HSP70/3/UIS24<br>(PbANKA_091440) | <i>Pb</i> HSP70-y<br>(PbANKA_135720) | <i>Pb</i> HOP<br>(PbANKA_101050) |
| <i>Pf</i> Hsp70-1 (PF3D7_0818900)     | <b>96%</b>                           | 54%                                  | 43%                                        | 21%                                  | -                                |
| <i>Pf</i> HSP70/2/BIP (PF3D7_0917900) | 56%                                  | <b>94%</b>                           | 47%                                        | 24%                                  | -                                |
| <i>Pf</i> HSP70/3 (PF3D7_1134000)     | 44%                                  | 48%                                  | <b>92%</b>                                 | 21%                                  | -                                |
| <i>Pf</i> HSP70-y (PF3D7_1344200)     | 19%                                  | 23%                                  | 19%                                        | <b>59%</b>                           | -                                |
| <i>Pf</i> HSP70-x (PF3D7_0831700)     | -                                    | -                                    | -                                          | -                                    | -                                |
| <i>Pf</i> HOP (PF3D7_1434300)         | -                                    | -                                    | -                                          | -                                    | <b>83%</b>                       |

<sup>a</sup> for nomenclature see Shonhai *et al.*, 2007
